# Supplementary material
Source: HighWire-hosted journal article supplement (http://www.cmaj.ca/highwire/filestream/69618/field_highwire_adjunct_files/0/170676-res-1-at.pdf)
Supplement: 170676-res-1-at.pdf [file 170676-res-1-at.pdf]

**Appendix 1 (as supplied by the authors):** Algorithm to classify UPC exposure status: family physician, pediatrician, no primary care

- 1) If patient had any billing code (i.e. service code) indicating that he/she was enrolled with a family physician then UPC = family physician.
- 2) No billing codes found in step 1, then if service code billed by pediatricians for monitoring of growth and development present then UPC = pediatrician.
- 3) No billing codes found in steps 1 or 2, then total number of visits with family physicians and pediatricians calculated. A UPC is assigned if there were at least 2 visits with the same physician in the 2-year exposure period up to 7 days prior to first time diagnosis of diabetes.
  - a. UPC = family physician if the maximum number of visits with the same family physician is  $\geq 2$  and is  $>$  the maximum number of visits with the same pediatrician.
  - b. UPC = pediatrician if the maximum number of visits with the same pediatrician is  $\geq 2$  and is  $>$  the maximum number of visits with the same family physician.
  - c. In the case of a tie, a UPC was assigned as a family physician if 2 complete annual medical exams were billed by a family physician; otherwise they were assigned a pediatrician.
- 4) If no UPC assigned through steps 1 to 3, then UPC = no primary care.

Step 3c was modified for the sensitivity analyses:

Analysis 1: UPC = pediatrician if patients have at least 2 visits with a pediatrician

Analysis 2: UPC = family physician if patients have at least 2 visits with a family physician

| Type of code                                     | Service Codes                                                                                                                                                                                             |
|--------------------------------------------------|-----------------------------------------------------------------------------------------------------------------------------------------------------------------------------------------------------------|
| Enrolment with family physician or pediatrician  | 00059, 08875, 08877, 15144, 15145, 15148, 15156, 15157, 15158, 15159, 15169, 15170, 15171, 15189, 19074, 19951, 19952, 19954, 19955, 19956, 19957, 19958, 19959, 19960                                    |
| Pediatrician (monitoring growth and development) | 09194                                                                                                                                                                                                     |
| Visits with family physicians or pediatricians   | 00002, 00007, 00012, 00075, 00474, 08855, 08857, 08858, 08866, 08867, 08870, 00005, 08871, 00056, 08872, 00097, 08873, 08874, 08901, 08807, 08902, 08809, 09092, 15161, 15230, 09127, 09129, 09171, 09172 |
